# Supplementary material for: Bioluminescent aptamer-based microassay for detection of melanoma inhibitory activity protein (MIA)
Source: Royal Society of Chemistry journal article supplement (doi:10.1039/d4ay00706a), 2024-01-01
Supplement: d4ay00706a1.pdf [file d4ay00706a1.pdf]

## Supplementary information

### **Bioluminescent aptamer-based microassay for detection of melanoma inhibitory activity (MIA) protein**

Eugenia E. Bashmakova<sup>a</sup>, Alexander N. Kudryavtsev<sup>a</sup>, Alexey E. Tupikin<sup>b</sup>, Marsel R. Kabilov<sup>b</sup>, Aleksey E. Sokolov<sup>c,d</sup>, Ludmila A. Frank<sup>a,d</sup>

<sup>a</sup>Institute of Biophysics, Federal Research Center “Krasnoyarsk Science Center SB RAS”, 660036, Krasnoyarsk, Russia

<sup>b</sup>Institute of Chemical Biology and Fundamental Medicine SB RAS, 630090, Novosibirsk, Russia

<sup>c</sup>Kirensky Institute of Physics, Federal Research Center “Krasnoyarsk Science Center SB RAS”, 660036, Krasnoyarsk, Russia

<sup>d</sup>Siberian Federal University, 660041, Krasnoyarsk, Russia

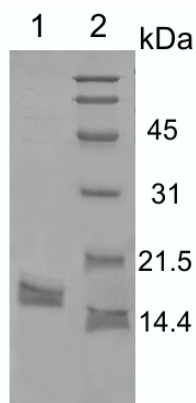

**Figure S1.** 15% SDS-PAGE analysis of His<sub>6</sub>-MIA sample. Lanes: 1 – His<sub>6</sub>-MIA after chromatography purification; 2 – standard proteins.

#### ***S1. ELISA assay of the recombinant MIA proteins***

Sandwich-type MIA colorimetric immunoassay based on horseradish peroxidase conjugate was performed using a commercial kit (R&D Systems, USA) according to the manufacturer's instructions. Optical density was measured with a plate colorimeter (Bio-Rad, USA).

The targets used were: (a) recombinant MIA protein obtained in this work; (b) recombinant MIA with biological activity (Novus Biologicals, USA); (c) human MIA standard (R&D Systems, USA). Samples (a) and (b) were diluted in concentrations from 576 to 4.5 ng/mL in standard

human serum (Vector Best, Russia). Sample (c) was diluted in PBS at concentrations ranging from 66 to 1 ng/mL in accord with the manufacturer's recommendations.

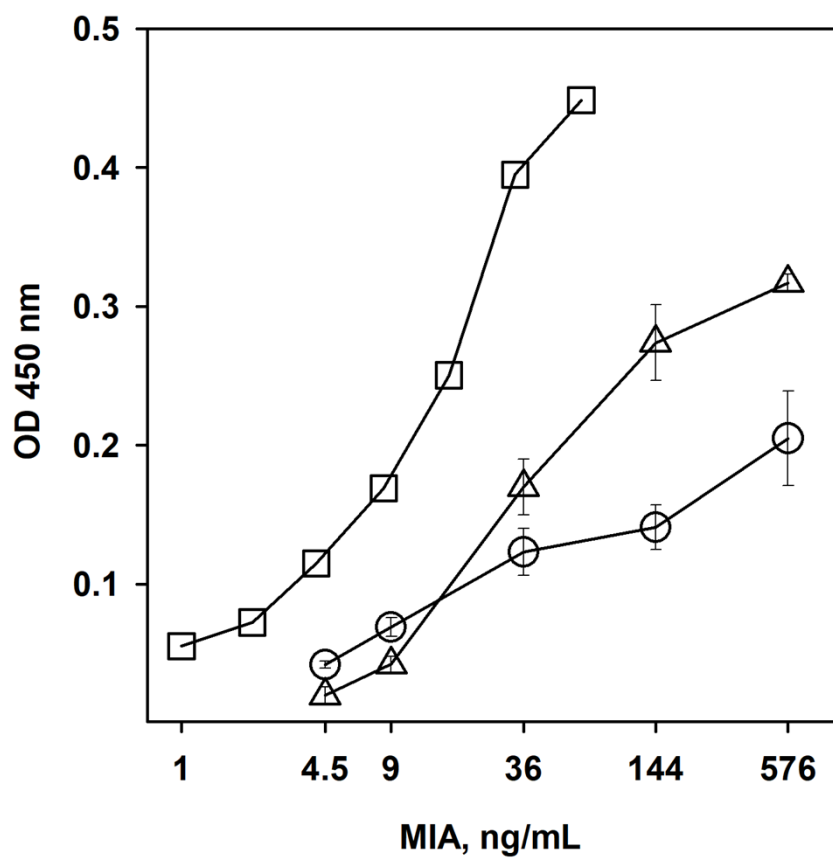

**Figure S2.** ELISA assay of the recombinant MIA proteins. Human MIA standard was analyzed in duplicate. The triangle denotes MIA obtained in this work, the circle – MIA from Novus Biologicals, the square – human MIA standard (R&D Systems). (n = 3).

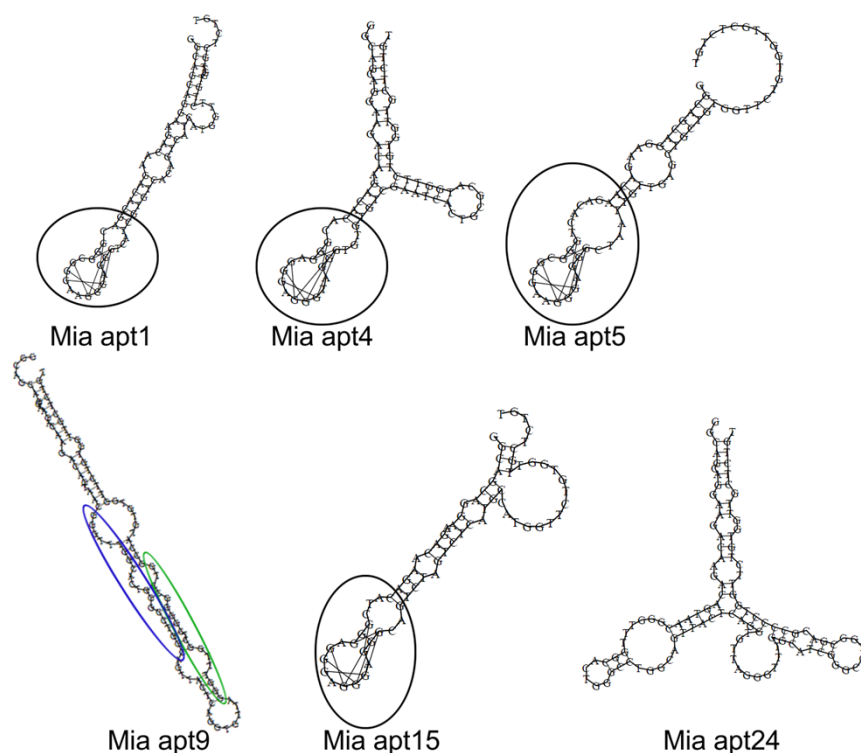

**Figure S3.** Predicted secondary structures of the full-size aptamers (RNAfold web server). Plausible formation route for GQ motifs according to RNAfold web server is shown in black circles and according to QGRS Mapper – in blue and green circles.

**Table S1.** Aptamers sequences. Constant regions are underlined

| Aptamer   | Sequence 5'-3'                                                                                                                           | Length | Frequency | G %; GQ motif (+ or -)* |
|-----------|------------------------------------------------------------------------------------------------------------------------------------------|--------|-----------|-------------------------|
| MIA apt1  | <u>GGCAGCAGGAAGACAAGACACGACGGGGGG</u><br>GAAGGGAGGGTTCATCGTGTTCACAGTCATC<br><u>ATGGTTCTGTGGTTGCTCTGT</u>                                 | 80     | 7968      | 38.8 (+)                |
| MIA apt4  | <u>GGCAGCAGGAAGACAAGACACGGGAGGG</u><br>AGGGTAGGGTGTGTGTTCGAATCACTGCGC<br><u>ATGGTTCTGTGGTTGCTCTGT</u>                                    | 80     | 1281      | 40 (+)                  |
| MIA apt5  | <u>GGCAGCAGGAAGACAAGACACTGGGCGGGA</u><br>AGGGAGGGCTAATTGTTGAGCTGCTG <u>TGG</u><br><u>TTCTGTGGTTGCTCTGT</u>                               | 76     | 1144      | 40.8 (+)                |
| MIA apt9  | <u>GGCAGCAGGAAGACAAGACAGTAACGGGTT</u><br>TGGCACTGGGCCTGGCAGTACTCAGGTG<br>TTAGGGTTTGGCTCGGGCCTGGCCATGTG<br><u>TGGTTCTGTGGTTGCTCTGT</u>    | 109    | 704       | 38.5 (-)                |
| MIA apt15 | <u>GGCAGCAGGAAGACAAGACATCGGGAGGGA</u><br>GGGAGGGCAGTCTAGTCTCATGCCAT <u>GGGT</u><br><u>CTGTGGTTGCTCTGT</u>                                | 75     | 374       | 38.7 (+)                |
| MIA apt24 | <u>GGCAGCAGGAAGACAAGACAGTAACGGGTT</u><br>TGGCACTGGGCCTGGCAGTACTCAGGTG<br>TTAGGGTTTGGCATCGGGCCTGGCGACGC<br><u>CCCTGGTTCTGTGGTTGCTCTGT</u> | 111    | 310       | 36.9 (-)                |

\*The secondary structures of aptamers predicted by VIENNA RNA fold.

## S2. Evaluation of the aptamers stability and functionality

Aliquots of 100  $\mu\text{M}$  water solutions of biotinylated aptamer MIAapt4.53 were stored for one year at  $-20\text{ }^{\circ}\text{C}$ . Prior to the experiment, the aptamer was folded in binding buffer (PBS, 1 mM  $\text{MgCl}_2$ ) by heating for 10 min at  $95\text{ }^{\circ}\text{C}$  followed by cooling at  $25\text{ }^{\circ}\text{C}$  for 15 min.

Aliquots of the conjugate MIAapt9-NLuc in the binding buffer containing 0.1% bovine serum albumin were stored for four months at  $-20\text{ }^{\circ}\text{C}$ . This conjugate was thawed and used without any processing.

The 100  $\mu\text{L}$  of biotinylated aptamer MIAapt 4.53 (70 nM in binding buffer) were placed into the plate wells, activated with streptavidin, incubated for 1 h at RT and washed. Then the 100  $\mu\text{L}$  aliquots of His<sub>6</sub>-MIA (10, 100,1000 ng/mL), in standard human blood serum, previously five-fold diluted and containing 0.05% Tween 20 were placed into the wells, incubated for 1 h at RT. After washing, the wells were loaded with 100  $\mu\text{L}$  of conjugate MIAapt9-NLuc solution (80 pM, binding buffer), incubated for 1 h at RT, then washed. The bioluminescent signal was measured with LB 940 Multimode Reader Mithras (Berthold, Germany) immediately after injection of freshly prepared 100  $\mu\text{L}$  of furimazine solution in PBS, the signal was integrated for 5 s.

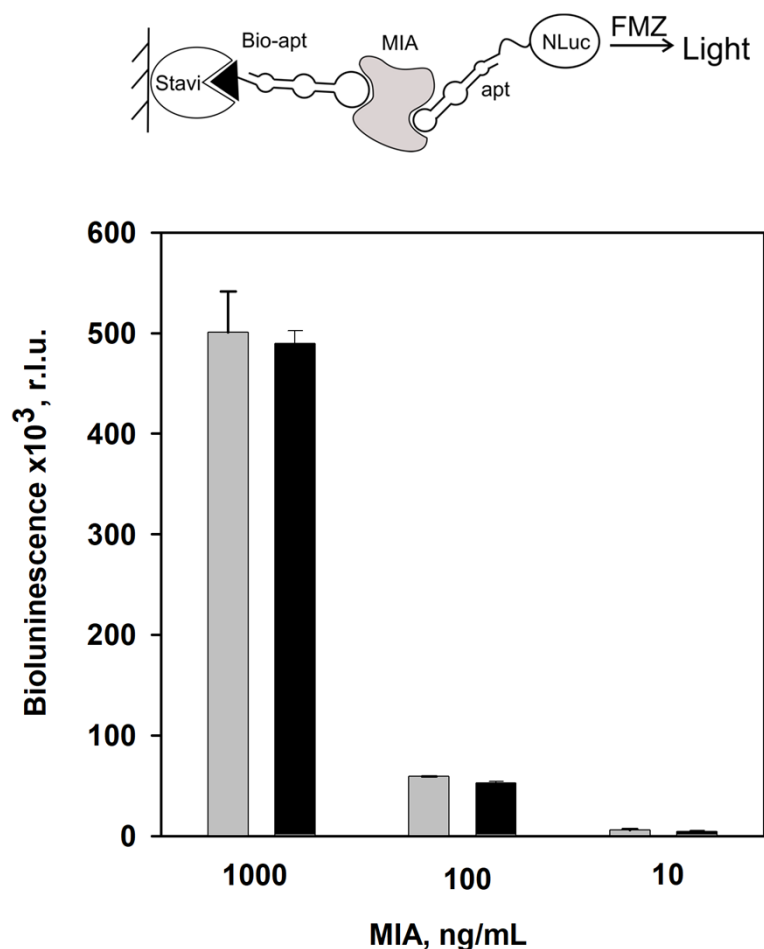

**Figure S4.** Sandwich-type aptamer-based solid-phase bioluminescent assay of MIA in standard human serum with freshly prepared aptamers (gray bars) and after storage (black bars), ( $n = 3$ ).

Bio-apt – biotinylated aptamer; FMZ – furimazine. Composition of complexes formed on the surface is given above.

### ***S3 Circular dichroism (CD) spectroscopy***

Aptamers MIAapt4.53 and MIAapt9 (3  $\mu$ M) were refolded by heating to 95  $^{\circ}$ C for 10 min in PBS, 1 mM MgCl<sub>2</sub> followed by cooling at 25  $^{\circ}$ C for 15 min. The CD spectra were taken at 20  $^{\circ}$ C on a SKD-2MUF recording spectrograph (Russia) using a quartz cell of 0.5-cm optical path length. All spectra were recorded in the 200-400 nm wavelength range, with spectral resolution of 3 nm. Each spectrum was acquired as an average of 6 scans.

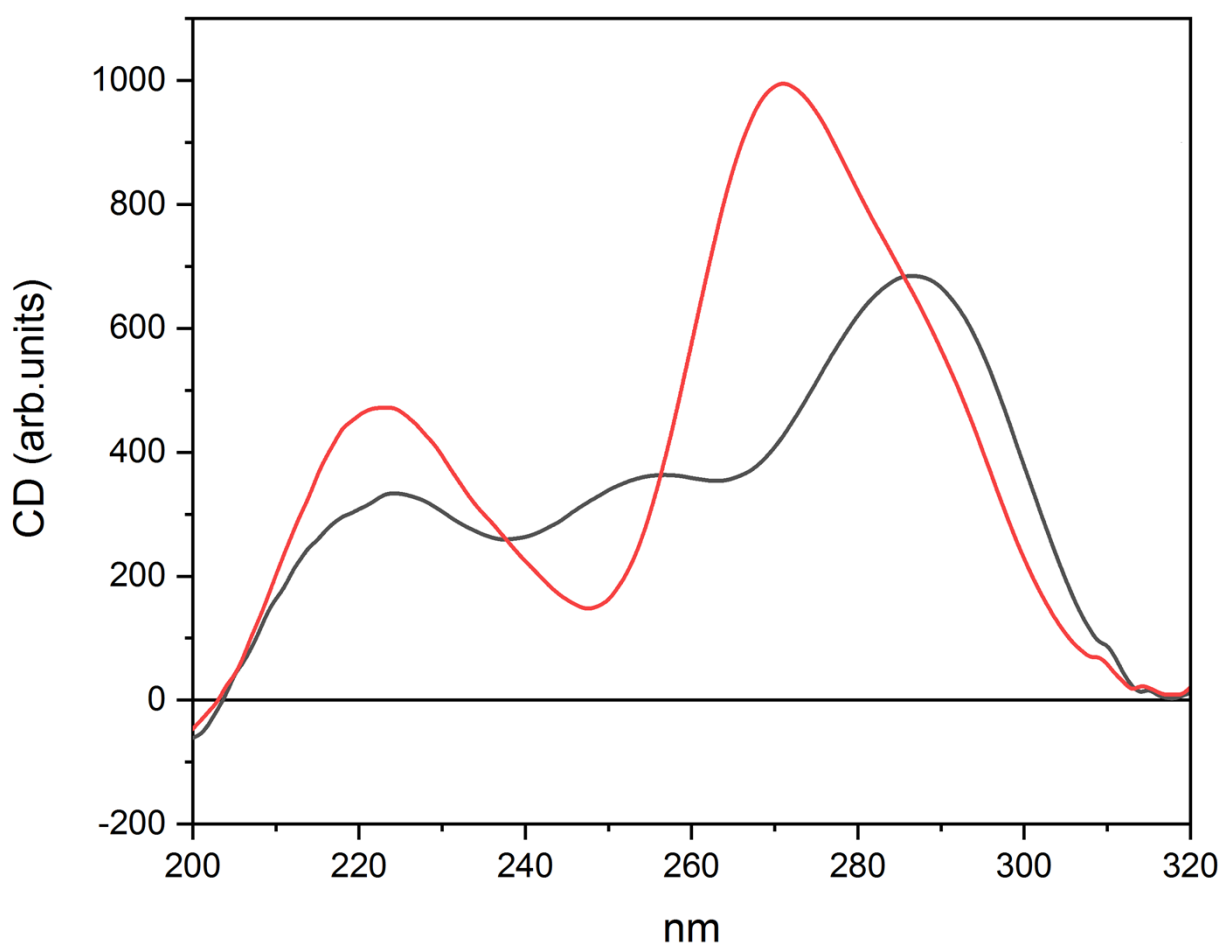

**Figure S5.** CD spectra of MIAapt4.53 (red line) and MIAapt9 (gray line), 3  $\mu$ M each in PBS, 1 mM MgCl<sub>2</sub>.
